# Supplementary material for: XGR software for enhanced interpretation of genomic summary data, illustrated by application to immunological traits
Source: PubMed Central journal article supplement (PMC5154134; doi:10.1186/s13073-016-0384-y), 2016-12-13
Supplement: 13073_2016_384_MOESM1_ESM.pdf [file 13073_2016_384_MOESM1_ESM.pdf]

# Enrichments under FDR < 0.05

*Hypergeometric test*

*Fisher's exact test*

*Binomial test*

viral infectious disease

disease by infectious agent

influenza

autoimmune disease of endocrine system

measles

liver disease

Graves' disease

hepatobiliary disease

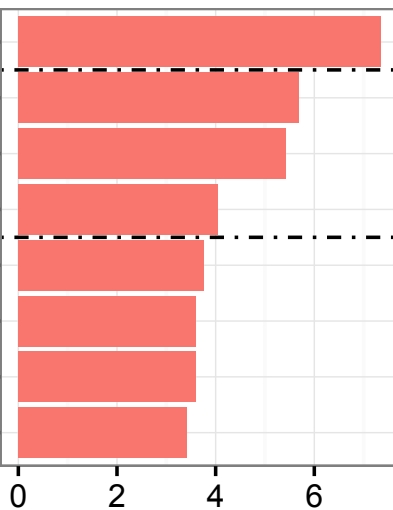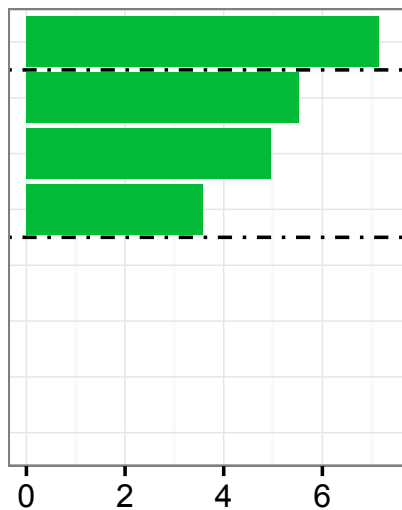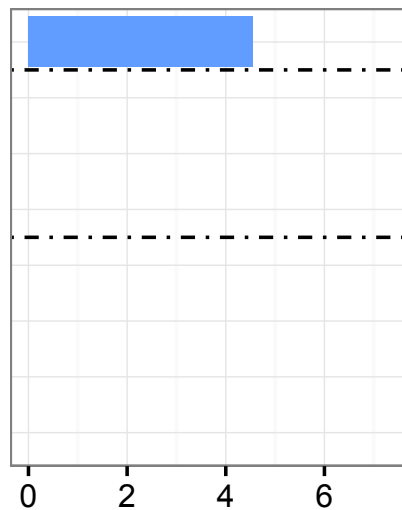

Enrichment significance:  $-\log_{10}(\text{p-value})$
