# Supplementary material for: XGR software for enhanced interpretation of genomic summary data, illustrated by application to immunological traits
Source: PubMed Central journal article supplement (PMC5154134; doi:10.1186/s13073-016-0384-y), 2016-12-13
Supplement: 13073_2016_384_MOESM2_ESM.pdf [file 13073_2016_384_MOESM2_ESM.pdf]

| <b>DO terms</b> |                                        | <b>Observed enrichments</b> |            | <b>Null simulations (10,000)</b>                    |                                                                               |
|-----------------|----------------------------------------|-----------------------------|------------|-----------------------------------------------------|-------------------------------------------------------------------------------|
| <i>ID</i>       | <i>Name</i>                            | <i>Z-score</i>              | <i>FDR</i> | <i>How often called significant (FDR &lt; 0.05)</i> | <i>How often called significant under the same or lower term-specific FDR</i> |
| DOID:934        | viral infectious disease               | 5.35                        | 3.10E-05   | 6 (0.06%)                                           | 0 (<0.01%)                                                                    |
| DOID:0050117    | disease by infectious agent            | 4.59                        | 7.30E-04   | 12 (0.12%)                                          | 0 (<0.01%)                                                                    |
| DOID:8469       | influenza                              | 4.41                        | 8.80E-04   | 1 (0.01%)                                           | 0 (<0.01%)                                                                    |
| DOID:0060005    | autoimmune disease of endocrine system | 3.65                        | 1.60E-02   | 1 (0.01%)                                           | 0 (<0.01%)                                                                    |
| DOID:8622       | measles                                | 3.39                        | 2.40E-02   | 3 (0.03%)                                           | 0 (<0.01%)                                                                    |
| DOID:409        | liver disease                          | 3.45                        | 2.50E-02   | 4 (0.04%)                                           | 1 (0.01%)                                                                     |
| DOID:12361      | Graves' disease                        | 3.38                        | 2.50E-02   | 1 (0.01%)                                           | 0 (<0.01%)                                                                    |
| DOID:3118       | hepatobiliary disease                  | 3.33                        | 3.40E-02   | 7 (0.07%)                                           | 1 (0.01%)                                                                     |
