# Supplementary material for: XGR software for enhanced interpretation of genomic summary data, illustrated by application to immunological traits
Source: PubMed Central journal article supplement (PMC5154134; doi:10.1186/s13073-016-0384-y), 2016-12-13

**A** Histogram plot of FDR calculated from the 20,000 simulated data  
Tumor suppressor (n=716)

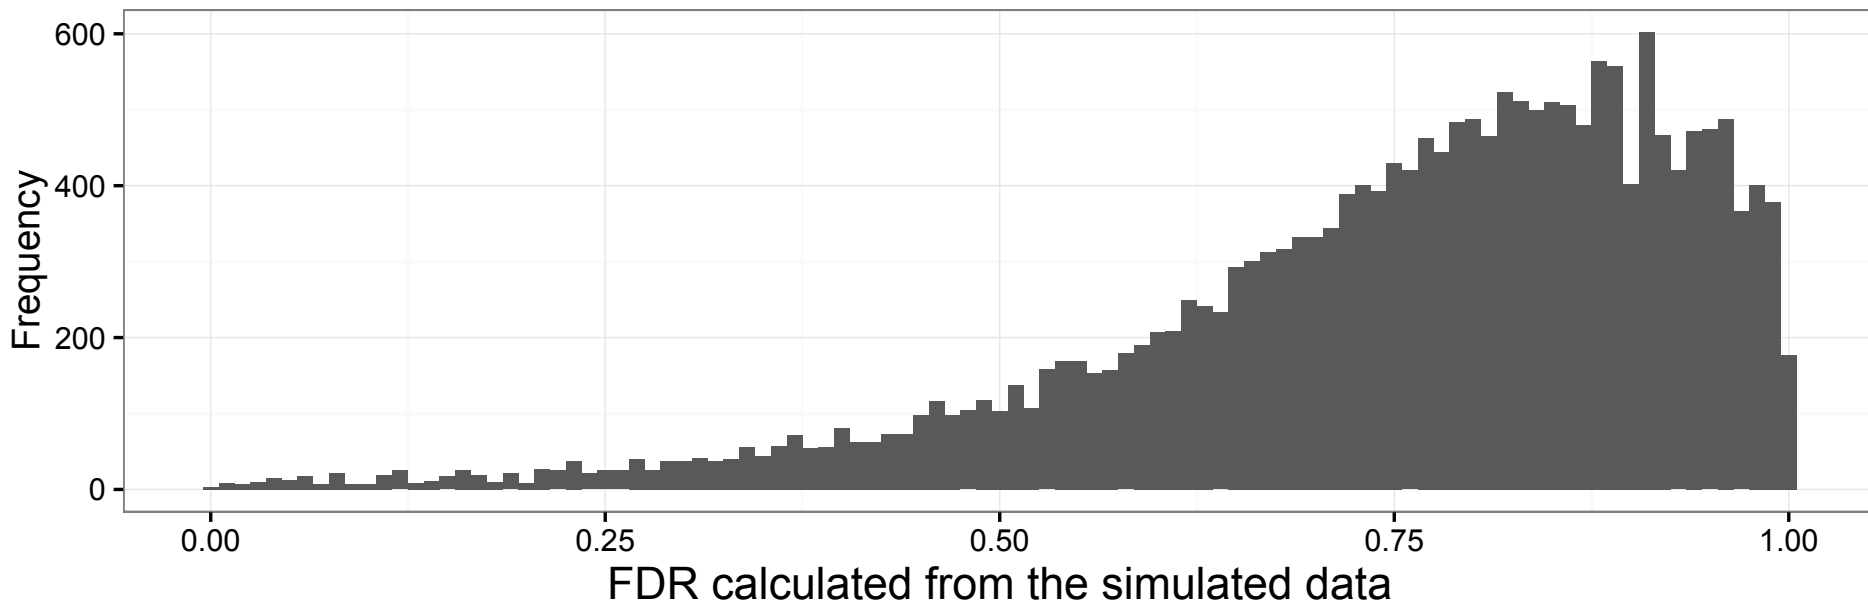

**B**

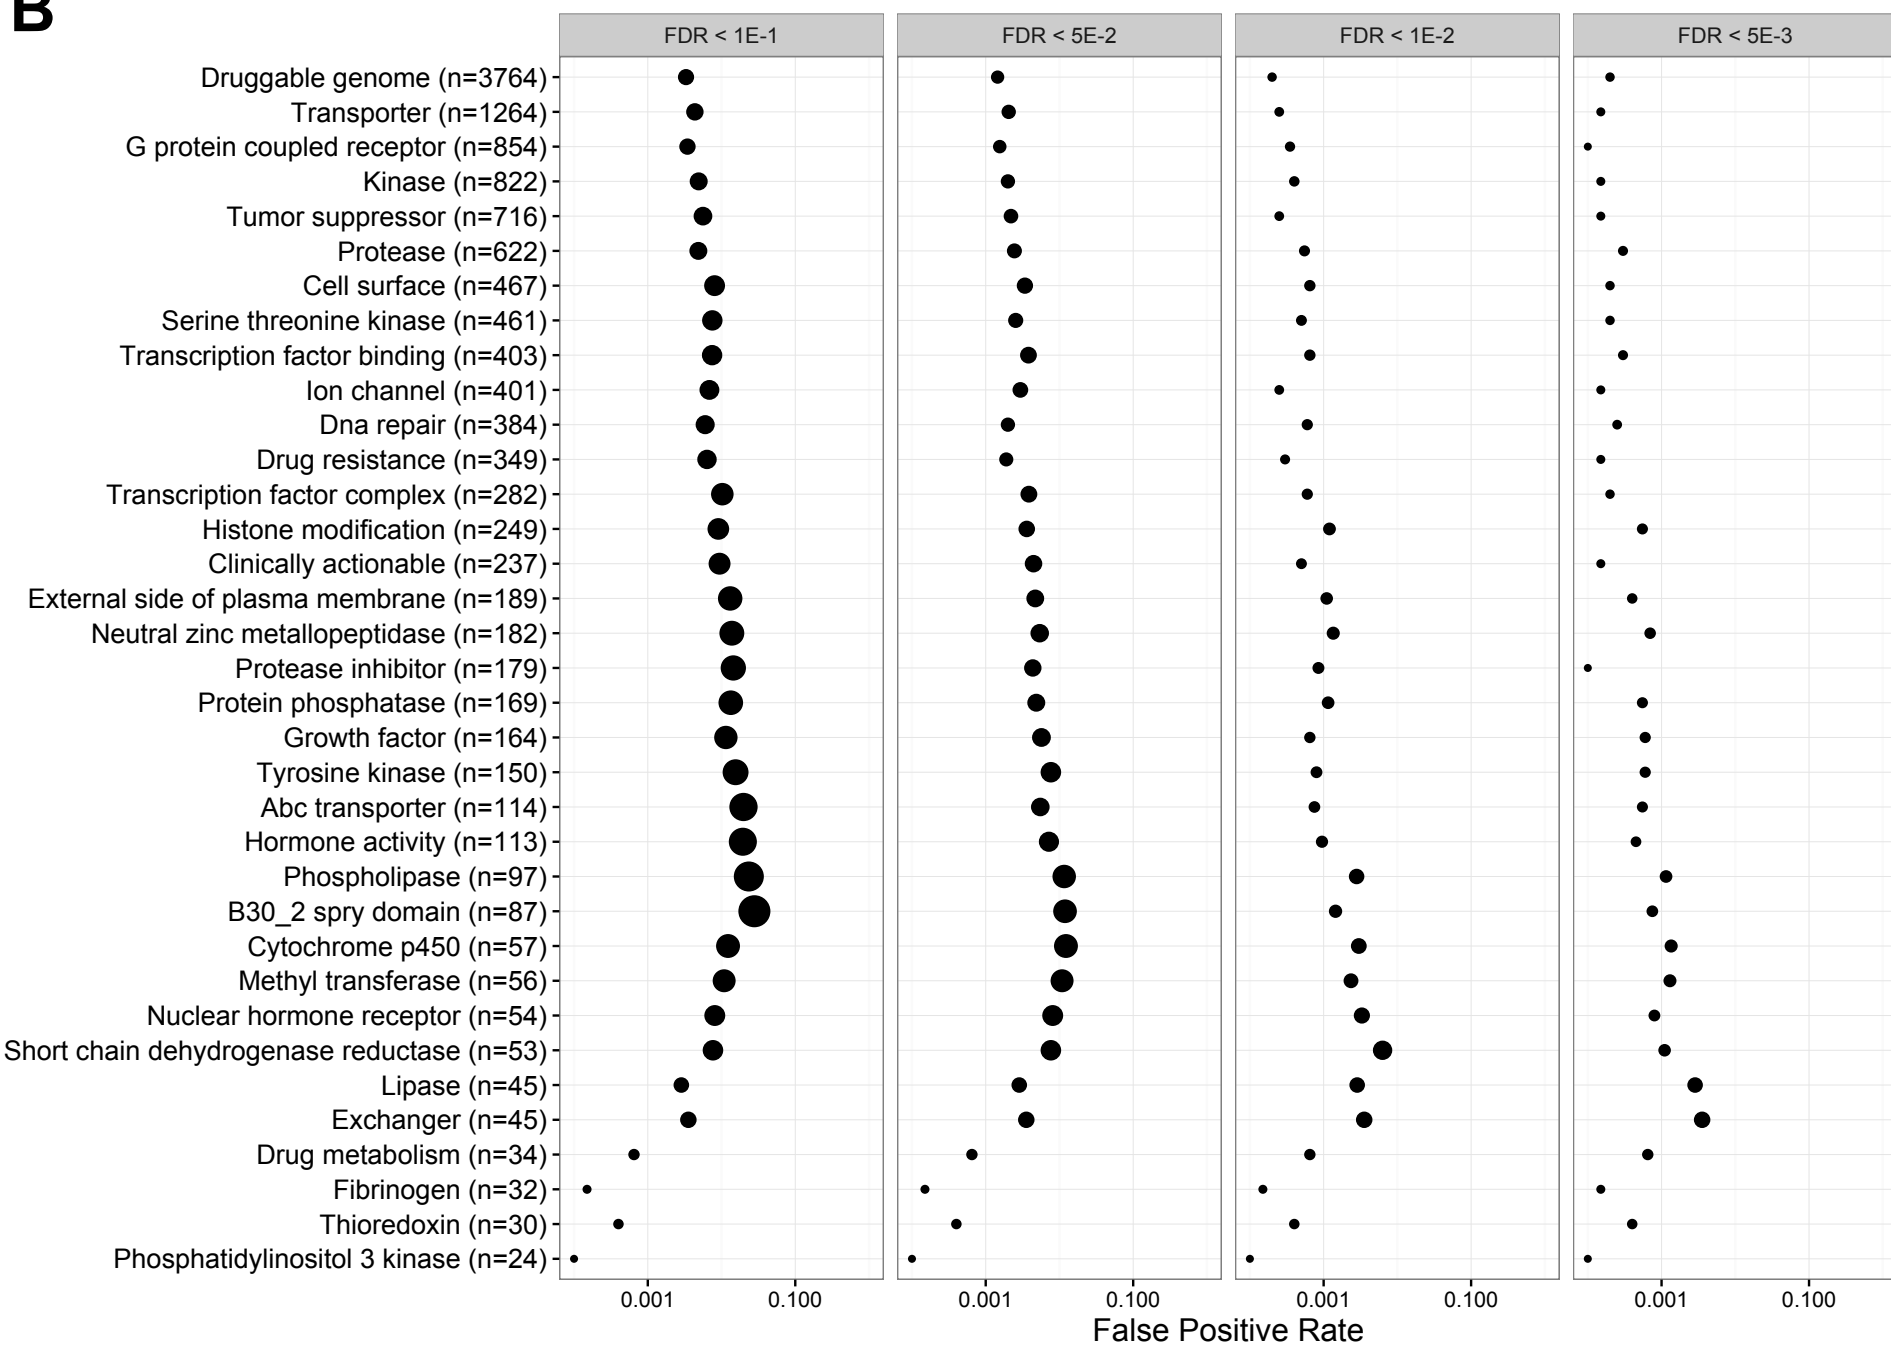

Supplement: 13073_2016_384_MOESM3_ESM.pdf [file 13073_2016_384_MOESM3_ESM.pdf]
