# Supplementary material for: XGR software for enhanced interpretation of genomic summary data, illustrated by application to immunological traits
Source: PubMed Central journal article supplement (PMC5154134; doi:10.1186/s13073-016-0384-y), 2016-12-13
Supplement: 13073_2016_384_MOESM5_ESM.pdf [file 13073_2016_384_MOESM5_ESM.pdf]

# Pearson Correlation

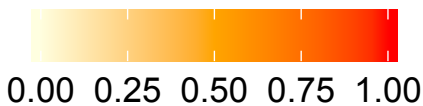

BM.max

1

BM.average

1

0.93

BM.complete

1

0.82

0.77

BM.complete

BM.average

BM.max
